# Supplementary material for: The Impact of Cultivation Systems on Weed Suppression and the Canopy Architecture of Spring Barley
Source: MDPI journal article supplement (doi:10.3390/agriculture13091747), 2023-09-02
Supplement: s1 [file s1]

**Table S1.** Weed infestation of spring barley. Interaction between tillage and N fertilization and year and N fertilization.

| Factors                 | Weed density<br>in spring | Weed density<br>in summer | Weed biomass<br>[g] |
|-------------------------|---------------------------|---------------------------|---------------------|
| CT <sup>#</sup>         |                           |                           |                     |
| 40 N                    | –                         | 11.2                      | 8.0                 |
| 80 N                    | –                         | 9.4                       | 6.3                 |
| 120 N                   | –                         | 9.6                       | 6.9                 |
| CTc                     |                           |                           |                     |
| 40 N                    | –                         | 17.8                      | 10.9                |
| 80 N                    | –                         | 15.1                      | 10.2                |
| 120 N                   | –                         | 13.0                      | 8.1                 |
| RTc                     |                           |                           |                     |
| 40 N                    | –                         | 20.3                      | 19.1                |
| 80 N                    | –                         | 17.4                      | 19.2                |
| 120 N                   | –                         | 17.2                      | 26.9                |
| NTc                     |                           |                           |                     |
| 40 N                    | –                         | 32.3                      | 36.7                |
| 80 N                    | –                         | 24.9                      | 41.0                |
| 120 N                   | –                         | 19.4                      | 31.2                |
| 2010                    |                           |                           |                     |
| 40 N                    | –                         | 21.0                      | 21.3                |
| 80 N                    | –                         | 17.8                      | 29.5                |
| 120 N                   | –                         | 14.2                      | 22.4                |
| 2011                    |                           |                           |                     |
| 40 N                    | –                         | 19.4                      | 13.2                |
| 80 N                    | –                         | 14.0                      | 12.9                |
| 120 N                   | –                         | 14.8                      | 10.7                |
| 2012                    |                           |                           |                     |
| 40 N                    | –                         | 20.8                      | 21.6                |
| 80 N                    | –                         | 18.3                      | 15.0                |
| 120 N                   | –                         | 15.4                      | 21.6                |
| Tillage × fertilization | –                         | NS                        | NS                  |
| Fertilization × year    | –                         | NS                        | NS                  |

<sup>#</sup>CT—conventional tillage. CTc—conventional tillage + cover crop. RTc—reduced tillage + cover crop. and NTc – no-tillage + cover crop. NS not significant

**Table S2.** Selected properties of spring barley canopy architecture. Interaction between tillage and N fertilization and year and N fertilization.

| Factors                 | LAI    | Barley tillers | Barley density<br>[no·m <sup>-2</sup> ] | Barley length<br>[cm] |
|-------------------------|--------|----------------|-----------------------------------------|-----------------------|
| CT <sup>#</sup>         |        |                |                                         |                       |
| 40 N                    | 1.22   | 2.53           | 294                                     | 52.5                  |
| 80 N                    | 1.43   | 2.69           | 286                                     | 53.6                  |
| 120 N                   | 1.67   | 2.69           | 311                                     | 55.8                  |
| CTc                     |        |                |                                         |                       |
| 40 N                    | 1.18   | 2.54           | 269                                     | 51.2                  |
| 80 N                    | 1.53   | 2.57           | 288                                     | 52.6                  |
| 120 N                   | 1.41   | 2.65           | 317                                     | 53.5                  |
| RTc                     |        |                |                                         |                       |
| 40 N                    | 1.15   | 2.74           | 214                                     | 49.4                  |
| 80 N                    | 1.37   | 2.88           | 242                                     | 50.7                  |
| 120 N                   | 1.39   | 3.12           | 248                                     | 51.5                  |
| NTc                     |        |                |                                         |                       |
| 40 N                    | 0.87   | 2.41           | 197                                     | 37.5                  |
| 80 N                    | 1.07   | 2.75           | 240                                     | 39.7                  |
| 120 N                   | 1.19   | 2.80           | 264                                     | 40.6                  |
| 2010                    |        |                |                                         |                       |
| 40 N                    | 0.91 b | 2.80 b         | 200                                     | 45.0                  |
| 80 N                    | 1.07 b | 2.96 ab        | 214                                     | 46.5                  |
| 120 N                   | 1.02 b | 2.98 ab        | 233                                     | 47.1                  |
| 2011                    |        |                |                                         |                       |
| 40 N                    | 1.40 a | 2.19 d         | 248                                     | 40.5                  |
| 80 N                    | 1.59 a | 2.27 cd        | 278                                     | 40.9                  |
| 120 N                   | 1.59 a | 2.24 cd        | 317                                     | 42.9                  |
| 2012                    |        |                |                                         |                       |
| 40 N                    | 1.01 b | 2.63 b         | 282                                     | 58.2                  |
| 80 N                    | 1.39 a | 2.99 ab        | 300                                     | 59.3                  |
| 120 N                   | 1.64 a | 3.23 a         | 294                                     | 61.1                  |
| Tillage x fertilization | NS     | NS             | NS                                      | NS                    |
| Fertilization x year    | **     | *              | NS                                      | NS                    |

<sup>#</sup> CT—conventional tillage. CTc—conventional tillage + cover crop. RTc—reduced tillage + cover crop. and NTc – no-tillage + cover crop. \*\* The means in a column followed by different letters show the significant differences ( $p < 0.05$ ) as per the Tukey test. Significance set at as follows: \*\*  $p < 0.01$ ; \*  $p < 0.05$ ; and NS not significant.

**Table S3.** Effect size for Analysis of Variance (ANOVA)

| Factors                                   | Effect                           | Df | MS     | F - value | P - value |
|-------------------------------------------|----------------------------------|----|--------|-----------|-----------|
| <b>Weed density in spring</b>             | Year                             | 2  | 3758.7 | 13.2      | <0.001    |
|                                           | Tillage                          | 3  | 6488.0 | 22.7      | <0.001    |
|                                           | Year × tillage                   | 6  | 5462.9 | 19.1      | <0.001    |
|                                           | Error                            | 72 | 285.4  |           |           |
| <b>Weed density in summer</b>             | Year                             | 2  | 42.6   | 0.2       | 0.85      |
|                                           | Error I                          | 6  | 262.3  |           |           |
|                                           | Tillage                          | 3  | 1129.4 | 8.8       | < 0.001   |
|                                           | Year × tillage                   | 6  | 850.3  | 6.6       | < 0.001   |
|                                           | Error II                         | 18 | 128.3  |           |           |
|                                           | Fertilization N                  | 2  | 293.4  | 6.6       | 0.003     |
|                                           | Year × fertilization N           | 4  | 18.5   | 0.4       | 0.80      |
|                                           | Tillage × fertilization N        | 6  | 57.2   | 1.3       | 0.28      |
|                                           | Year × tillage × fertilization N | 12 | 71.1   | 1.6       | 0.12      |
|                                           | Error III                        | 48 | 44.4   |           |           |
| <b>Weed biomass [g]</b>                   | Year                             | 2  | 1336.6 | 2.5       | 0.16      |
|                                           | Error I                          | 6  | 544.5  |           |           |
|                                           | Tillage                          | 3  | 4813.8 | 12.3      | < 0.001   |
|                                           | Year × tillage                   | 6  | 3770.9 | 9.6       | < 0.001   |
|                                           | Error II                         | 18 | 391.4  |           |           |
|                                           | Fertilization N                  | 2  | 6.9    | 0.04      | 0.96      |
|                                           | Year × fertilization N           | 4  | 215.7  | 1.4       | 0.26      |
|                                           | Tillage × fertilization N        | 6  | 138.2  | 0.9       | 0.52      |
|                                           | Year × tillage × fertilization N | 12 | 294.2  | 1.9       | 0.06      |
|                                           | Error III                        | 48 | 157.6  |           |           |
| <b>LAI</b>                                | Year                             | 2  | 2.585  | 20.5      | 0.02      |
|                                           | Error I                          | 6  | 0.126  |           |           |
|                                           | Tillage                          | 3  | 0.816  | 6.6       | 0.003     |
|                                           | Year × tillage                   | 6  | 0.412  | 3.3       | 0.02      |
|                                           | Error II                         | 18 | 0.123  |           |           |
|                                           | Fertilization N                  | 2  | 0.969  | 21.7      | < 0.001   |
|                                           | Year × fertilization N           | 4  | 0.238  | 5.3       | 0.001     |
|                                           | Tillage × fertilization N        | 6  | 0.061  | 1.4       | 0.25      |
|                                           | Year × tillage × fertilization N | 12 | 0.289  | 0.6       | 0.79      |
|                                           | Error III                        | 48 | 0.045  |           |           |
| <b>Barley tillers</b>                     | Year                             | 2  | 5.883  | 61.1      | < 0.001   |
|                                           | Error I                          | 6  | 0.096  |           |           |
|                                           | Tillage                          | 3  | 0.589  | 6.5       | 0.003     |
|                                           | Year × tillage                   | 6  | 0.526  | 5.8       | 0.002     |
|                                           | Error II                         | 18 | 0.090  |           |           |
|                                           | Fertilization N                  | 2  | 0.741  | 8.5       | < 0.001   |
|                                           | Year × fertilization N           | 4  | 0.257  | 2.9       | 0.03      |
|                                           | Tillage × fertilization N        | 6  | 0.074  | 0.8       | 0.54      |
|                                           | Year × tillage × fertilization N | 12 | 0.148  | 1.7       | 0.10      |
|                                           | Error III                        | 48 | 0.087  |           |           |
| <b>Barley density [no·m<sup>-2</sup>]</b> | Year                             | 2  | 61109  | 29.6      | < 0.001   |
|                                           | Error I                          | 6  | 2068   |           |           |
|                                           | Tillage                          | 3  | 35353  | 15.6      | < 0.001   |
|                                           | Year × tillage                   | 6  | 6526   | 2.9       | 0.038     |
|                                           | Error II                         | 18 | 2273   |           |           |
|                                           | Fertilization N                  | 2  | 13247  | 8.4       | < 0.001   |
|                                           | Year × fertilization N           | 4  | 2779   | 1.8       | 0.15      |
|                                           | Tillage × fertilization N        | 6  | 1261   | 0.8       | 0.57      |
|                                           | Year × tillage × fertilization N | 12 | 1662   | 1.05      | 0.41      |
|                                           | Error III                        | 48 |        |           |           |

|                                   |                                  |    |        |       |         |
|-----------------------------------|----------------------------------|----|--------|-------|---------|
|                                   | Error III                        | 48 | 1571   |       |         |
| <b>Barley<br/>length<br/>[cm]</b> | Year                             | 2  | 3163.9 | 30.2  | < 0.001 |
|                                   | Error I                          | 6  | 104.9  |       |         |
|                                   | Tillage                          | 3  | 1197.8 | 114.7 | < 0.001 |
|                                   | Year × tillage                   | 6  | 358.9  | 34.4  | < 0.001 |
|                                   | Error II                         | 18 | 10.4   |       |         |
|                                   | Fertilization N                  | 2  | 55.5   | 4.4   | 0.007   |
|                                   | Year × fertilization N           | 4  | 1.8    | 0.2   | 0.950   |
|                                   | Tillage × fertilization N        | 6  | 4.8    | 0.5   | 0.824   |
|                                   | Year × tillage × fertilization N | 12 | 8.3    | 0.8   | 0.639   |
|                                   | Error III                        | 48 | 10.2   |       |         |
